# Supplementary material for: Estimating RNA dynamics using one time point for one sample in a single-pulse metabolic labeling experiment
Source: Springer Nature journal article supplement (doi:10.1186/s12859-022-04672-4), 2022-04-22
Supplement: 12859_2022_4672_MOESM1_ESM.pdf [file 12859_2022_4672_MOESM1_ESM.pdf]

## Appendix A Derivation of the model solution

This is a first order linear ordinary differential equation in  $p(t)$  and  $m(t)$  that can be expressed in matrix form as

$$\begin{pmatrix} \dot{p} \\ \dot{m} \end{pmatrix} = \begin{pmatrix} -\beta & 0 \\ \beta & -\gamma \end{pmatrix} \begin{pmatrix} p \\ m \end{pmatrix} + \begin{pmatrix} \alpha \\ 0 \end{pmatrix} \quad (\text{A.18})$$

The solution to this equation is given by

$$\begin{pmatrix} p \\ m \end{pmatrix} = k_1 \mathbf{v} \exp(\lambda_1 t) + k_2 \mathbf{w} \exp(\lambda_2 t) + \begin{pmatrix} \frac{\alpha}{\beta} \\ \frac{\alpha}{\gamma} \end{pmatrix}, \quad (\text{A.19})$$

where  $k_1$  and  $k_2$  are scalar constants determined by the boundary conditions,  $\lambda_1, \lambda_2$  are eigenvalues of the matrix in (A.18) and  $\mathbf{v}, \mathbf{w}$  are the corresponding eigenvectors.

The eigenvalues are given by  $\lambda_1 = -\beta$  and  $\lambda_2 = -\gamma$ . The first eigenvector  $\mathbf{v}$  is obtained by solving

$$\begin{cases} -\beta \mathbf{v}_1 = -\beta \mathbf{v}_1 \\ \beta \mathbf{v}_1 - \gamma \mathbf{v}_2 = -\beta \mathbf{v}_2 \end{cases} \Rightarrow \mathbf{v}_1 = \frac{\gamma - \beta}{\beta} \mathbf{v}_2 \Rightarrow \mathbf{v} \propto \begin{pmatrix} \gamma - \beta \\ \beta \end{pmatrix} \quad (\text{A.20})$$

Similarly the second eigenvector is obtained by solving

$$\begin{cases} -\beta \mathbf{w}_1 = -\gamma \mathbf{w}_1 \\ \beta \mathbf{w}_1 - \gamma \mathbf{w}_2 = -\gamma \mathbf{w}_2 \end{cases} \Rightarrow \mathbf{w}_1 = 0 \Rightarrow \mathbf{w} \propto \begin{pmatrix} 0 \\ 1 \end{pmatrix}.$$

The solution to (A.18) is thus given by

$$\begin{pmatrix} p \\ m \end{pmatrix} = k_1 \begin{pmatrix} \gamma - \beta \\ \beta \end{pmatrix} \exp(-\beta t) + k_2 \begin{pmatrix} 0 \\ 1 \end{pmatrix} \exp(-\gamma t) + \begin{pmatrix} \frac{\alpha}{\beta} \\ \frac{\alpha}{\gamma} \end{pmatrix}.$$

Expressed by its component this is equivalent to

$$p(t) = k_1(\gamma - \beta) \exp(-\beta t) + \frac{\alpha}{\beta} \quad (\text{A.21})$$

$$m(t) = k_1 \beta \exp(-\beta t) + k_2 \exp(-\gamma t) + \frac{\alpha}{\gamma} \quad (\text{A.22})$$

We now turn to the boundary conditions to determine  $k_1$  and  $k_2$ . The boundary conditions are different for the unlabeled and the labeled RNA.

### Unlabeled RNA

Like in [19], we assume the system to be in steady-state prior to labeling. The steady-state is given by solving (A.18) with  $\dot{p} = \dot{m} = 0$ .

$$\begin{cases} 0 = -\beta p + \alpha \\ 0 = \beta p - \gamma m \end{cases} \Rightarrow \begin{cases} p = \frac{\alpha}{\beta} \\ 0 = \beta \frac{\alpha}{\beta} - \gamma m \end{cases} \Rightarrow \begin{cases} p = \frac{\alpha}{\beta} \\ m = \frac{\alpha}{\gamma} \end{cases} \quad (\text{A.23})$$

During labeling time, we assume that no unlabeled RNA is synthesized such that  $\alpha = 0$ . Assuming that we start labeling at time  $t = 0$ , we thus have

$$p_u(0) = \frac{\alpha}{\beta} \Rightarrow k_1(\gamma - \beta) = \frac{\alpha}{\beta} \Rightarrow k_1 = \frac{\alpha}{\beta(\gamma - \beta)} \quad (\text{A.24})$$

Moreover we have

$$m_u(0) = \frac{\alpha}{\gamma} \Rightarrow \frac{\alpha}{\gamma - \beta} + k_2 = \frac{\alpha}{\gamma} \Rightarrow k_2 = \frac{\alpha}{\gamma} - \frac{\alpha}{\gamma - \beta} = \frac{-\beta\alpha}{\gamma(\gamma - \beta)}$$

This leads us to the solution for the unlabeled RNA

$$p_u(t) = \frac{\alpha}{\beta} \exp(-\beta t) \tag{A.25}$$

$$m_u(t) = \frac{\alpha}{\gamma - \beta} \exp(-\beta t) - \frac{\beta\alpha}{\gamma(\gamma - \beta)} \exp(-\gamma t), \tag{A.26}$$

where the  $u$  label indicates that this corresponds to the unlabeled RNA pool.

### Labeled RNA

The solution for the labeled RNA could be obtained the same way as for the unlabeled RNA, but setting  $\alpha \neq 0$  and  $p_l(0) = m_l(0) = 0$ . However, it is simpler to notice that the total RNA (labeled and non-labeled) stay at steady-state during the labeling such that we have the following solution for labeled RNA.

$$p_l(t) = \frac{\alpha}{\beta} - p_u(t) = \frac{\alpha}{\beta} (1 - \exp(-\beta t))$$

$$m_l(t) = \frac{\alpha}{\gamma} - m_u(t) = \frac{\alpha}{\gamma} \left(1 + \frac{\beta}{(\gamma - \beta)} \exp(-\gamma t)\right) - \frac{\alpha}{\gamma - \beta} \exp(-\beta t)$$

where the  $l$  label indicates that this corresponds to the labeled RNA pool.
