# Supplementary material for: Estimating RNA dynamics using one time point for one sample in a single-pulse metabolic labeling experiment
Source: PubMed Central journal article supplement (PMC9034570; doi:10.1186/s12859-022-04672-4), 2022-04-22
Supplement: 12859_2022_4672_MOESM2_ESM.pdf [file 12859_2022_4672_MOESM2_ESM.pdf]

## Appendix B Equation simplification

In this appendix we show how the the system given by equations (10, 11) can be simplified to Eq. (13) to infer the ratio  $k$  between the processing and degradation rate. Starting from

$$a = \frac{(1-k)E_{k\gamma}}{E_{k\gamma} - k^2E_\gamma} \quad (\text{B.27})$$

$$b = \frac{(1-k)(1-E_{k\gamma})}{(1-E_{k\gamma}) - k^2(1-E_\gamma)}, \quad (\text{B.28})$$

we have

$$a(E_{k\gamma} - k^2E_\gamma) = (1-k)E_{k\gamma} \quad (\text{B.29})$$

$$b((1-E_{k\gamma}) - k^2(1-E_\gamma)) = (1-k)(1-E_{k\gamma}). \quad (\text{B.30})$$

Summing (B.29) and (B.30) yields

$$E_{k\gamma}(a-b) + k^2E_\gamma(b-a) + b(1-k^2) = 1-k \quad (\text{B.31})$$

$$\begin{aligned} \Leftrightarrow E_{k\gamma} - k^2E_\gamma &= \frac{(1-k) - b(1-k^2)}{a-b} \\ &= \frac{(1-k)(1-b(1+k))}{a-b}. \end{aligned} \quad (\text{B.32})$$

Dividing (B.29) by (B.30) and inserting (B.32) results in

$$\begin{aligned} \frac{E_{k\gamma}}{1-E_{k\gamma}} &= \frac{a}{b} \frac{E_{k\gamma} - k^2E_\gamma}{(1-E_{k\gamma}) - k^2(1-E_\gamma)} \\ &= \frac{a}{b} \frac{E_{k\gamma} - k^2E_\gamma}{(1-k^2) - (E_{k\gamma} - k^2E_\gamma)} \\ &= \frac{a}{b} \frac{(1-k)(1-b(1+k))}{(1-k^2)(a-b) - (1-k)(1-b(1+k))} \\ &= \frac{a}{b} \frac{1-b(1+k)}{(1+k)(a-b) - 1 + b(1+k)} \\ &= \frac{a}{b} \frac{1-b(1+k)}{(1+k)a - 1} = \frac{a-ab(1+k)}{b-ab(1+k)} \end{aligned} \quad (\text{B.33})$$

It follows that

$$E_{k\gamma}(b-ab(1+k)) = (E_{k\gamma} - 1)(a-ab(1+k)) \quad (\text{B.34})$$

$$\Leftrightarrow (b-a)E_{k\gamma} = ab(1+k) - a, \quad (\text{B.35})$$

an thus

$$\exp(-k\gamma T) = E_{k\gamma} = \frac{kab + ab - a}{b-a} = \frac{a(bk + b - 1)}{b-a} \quad (\text{B.36})$$

$$\Leftrightarrow k\gamma T = \log\left(\frac{b-a}{a(bk + b - 1)}\right) \quad (\text{B.37})$$

Moreover, from (10), we have that

$$\begin{aligned} a &= \frac{1-k}{1-k^2 \exp((k-1)\gamma T)} \Leftrightarrow \exp((k-1)\gamma T) = \frac{(1-\frac{1-k}{a})}{k^2} \\ \Leftrightarrow (k-1)\gamma T &= \log\left(\frac{k+a-1}{k^2 a}\right) \end{aligned} \quad (\text{B.38})$$

Multiplying (B.37) by  $\frac{k-1}{k}$  and subtracting (B.38) results in

$$0 = \frac{k}{k-1} \log\left(\frac{k+a-1}{k^2 a}\right) - \log\left(\frac{(b-a)}{a(bk+b-1)}\right). \quad (\text{B.39})$$

This equation also provides upper and lower bounds for  $k$  as both  $\frac{k+a-1}{a}$  and  $bk+b-1$  must be strictly positive for their logarithm to be defined and

$$0 < \exp(-\beta T) = E_{k\gamma} = \frac{kab+ab-a}{b-a} < 1 \quad \forall \beta T > 0 \quad (\text{B.40})$$

for (B.36) to hold. Developing these three conditions results in the following domain of definition  $\mathcal{D}$  for  $k$ :

$$\max\left(\frac{1}{b}-1, 1-a\right) < k < \frac{1}{a}-1, \quad (\text{B.41})$$

where  $0 < a < b < 1$ .
