# Supplementary material for: Estimating RNA dynamics using one time point for one sample in a single-pulse metabolic labeling experiment
Source: PubMed Central journal article supplement (PMC9034570; doi:10.1186/s12859-022-04672-4), 2022-04-22
Supplement: 12859_2022_4672_MOESM3_ESM.pdf [file 12859_2022_4672_MOESM3_ESM.pdf]

## Appendix C Proof of uniqueness of solution

In this appendix, we prove that (13) has a single solution for  $b > (2 - a)^{-1}$ . We first note that  $b > (2 - a)^{-1} \Leftrightarrow \frac{1-b}{b} < 1 - a$ , so the lower bound for  $k$  is  $k_- = 1 - a$ . We then define the right-hand side of (13) as

$$g(x) = \frac{x}{x-1} \log\left(\frac{1}{x^2}\left(1 - \frac{1-x}{a}\right)\right) - \log\left(\frac{(b-a)}{a(b(x+1)-1)}\right) \quad (\text{C.42})$$

$$\begin{aligned} &= \frac{x}{x-1} \left( -2 \log(x) + \log(a+x-1) - \log(a) \right) \\ &\quad - \log(b-a) + \log(a) + \log(b(x+1)-1) \end{aligned} \quad (\text{C.43})$$

We then observe that on that lower bound  $\lim_{x \rightarrow 1-a} g(x) = +\infty$  because  $a+x-1$  tends to zero and  $x-1$  is negative.

On the other hand, for the upper bound  $k_+ = \frac{1-a}{a}$ , we have

$$\begin{aligned} a+x-1 &= \frac{a^2+1-a-a}{a} = \frac{(1-a)^2}{a} \\ b(x+1)-1 &= \frac{b}{a} - 1 = \frac{b-a}{a} \end{aligned}$$

we can deduce that the upper bound of  $x$  is a zero of  $g$ :

$$\begin{aligned} g\left(\frac{1-a}{a}\right) &= \\ \frac{1-a}{1-2a} &\left( -2 \log(1-a) + 2 \log(a) + 2 \log(1-a) - 2 \log(a) \right) \\ &- \log(b-a) + \log(a) + \log(b-a) - \log(a) = 0. \end{aligned} \quad (\text{C.44})$$

Moreover, the derivative of  $g$  is given by:

$$\begin{aligned} g'(x) &= -\frac{1}{(x-1)^2} \left( -2 \log(x) + \log(a+x-1) - \log(a) \right) \\ &\quad + \frac{x}{x-1} \left( -\frac{2}{x} + \frac{1}{a+x-1} \right) + \frac{b}{b(x+1)-1}. \end{aligned} \quad (\text{C.45})$$

Then

$$\begin{aligned} g'\left(\frac{1-a}{a}\right) &= \frac{-a^2}{(1-2a)^2} \left( -2 \log(1-a) + 2 \log(a) + 2 \log(1-a) \right. \\ &\quad \left. - 2 \log(a) \right) + \frac{1-a}{1-2a} \left( \frac{-2a}{1-a} + \frac{a}{(1-a)^2} \right) + \frac{ba}{b-a} \\ &= \frac{1}{1-2a} \frac{2a-1}{1-a} + \frac{ba}{b-a} \\ &= -\frac{a}{1-a} + \frac{ba}{b-a} \\ &= \frac{a^2(1-b)}{(b-a)(1-a)} > 0 \quad \text{if } 0 < a < b < 1. \end{aligned} \quad (\text{C.46})$$

Since  $g(k_+)$  reaches zero from below, while  $g(k_-) > 0$ , we can infer that  $g(x)$  has a zero between  $k_-$  and  $k_+$  as illustrated on Fig C.7.

To show that this zero is unique, we look at the sign of  $g'(x)$ .

We can rewrite  $g'(x)$  as

$$g'(x) = \frac{1}{(x-1)^2} (A(x) - B(x)) \quad (\text{C.47})$$

where

$$A(x) = \frac{(1-x)(x(ab+b-1) - (3b-2)(1-a))}{(x+a-1)(bx+b-1)}$$

$$B(x) = \log\left(\frac{a+x-1}{ax^2}\right)$$

Let  $x_0$  be a zero of  $g'$ , i.e., the position of a local extrema of  $g$ . We have

$$g(x_0) = \frac{x_0}{x_0-1} \log\left(\frac{x_0+a-1}{ax_0^2}\right) - \log\left(\frac{(b-a)}{a(b(x_0+1)-1)}\right)$$

$$= \frac{-x_0(x_0(ab+b-1) - (3b-2)(1-a))}{(x_0+a-1)(bx_0+b-1)}$$

$$- \log\left(\frac{(b-a)}{a(b(x_0+1)-1)}\right) \quad (\text{C.48})$$

The second equality holds because  $g'(x_0) = 0$  by definition of  $x_0$ . By multiplying (C.48) by  $(bx_0+b-1)$ , which is positive, we can then define a new function  $h(x)$  whose sign is the same as the sign of  $g(x)$  for  $x = x_0$  (see Fig C.7 for an illustration).

$$h(x) = C(x) - D(x), \quad (\text{C.49})$$

where

$$C(x) = \frac{-x(x(ab+b-1) - (3b-2)(1-a))}{(x+a-1)}$$

$$D(x) = (bx+b-1) \log\left(\frac{(b-a)}{a(bx+b-1)}\right) \quad (\text{C.50})$$

We can now compute the second derivatives of  $C(x)$  and  $D(x)$ .

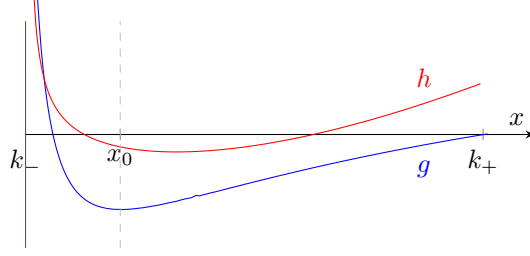

Figure C.7: Sketch of the proof that  $g(x)$  has a single zero in  $\mathcal{D} = (k_-, k_+)$ . We first show that  $\lim_{x \rightarrow k_-} g(x) = \infty$ , that  $\lim_{x \rightarrow k_+} g(x) = 0$  and  $\lim_{x \rightarrow k_+} g'(x) > 0$ , so that  $g$  must cross the x-axis on  $\mathcal{D}$ . To show that it only does it once, we consider a function  $h(x)$  that has the same sign as  $g(x)$  when  $g'(x) = 0$ . We show that  $h$  is convex on  $\mathcal{D}$  and thus  $g$  cannot have a negative extrema, followed by a positive extrema, followed by a negative extrema. Hence it cannot have more than one zero on  $\mathcal{D}$ .

$$\begin{aligned}
C'(x) &= -\frac{(2x(ab+b-1) - (3b-2)(1-a))(x+a-1)}{(x+a-1)^2} \\
&\quad + \frac{x^2(ab+b-1) - x(3b-2)(1-a)}{(x+a-1)^2} \\
&= -\frac{x^2(ab+b-1) - 2x(1-a)(ab+b-1) + (3b-2)(1-a)^2}{(x+a-1)^2} \\
C''(x) &= -\frac{(2x(ab+b-1) - 2(1-a)(ab+b-1))(x+a-1)}{(x+a-1)^3} \\
&\quad + \frac{2(x^2(ab+b-1) - 2x(1-a)(ab+b-1) + (3b-2)(1-a)^2)}{(x+a-1)^3} \\
&= -\frac{2(1-a)^2(ab-2b+1)}{(x+a-1)^3} > 0 \quad \forall b > \frac{1}{2-a} \\
D'(x) &= b \log\left(\frac{b-a}{a}\right) - b(\log(bx+b-1) + 1) \\
D''(x) &= -\frac{b^2}{bx+b-1} < 0 \quad \forall x > k_-
\end{aligned}$$

Hence

$$h''(x) = C''(x) - D''(x) < 0 \quad \forall x \in \mathcal{D}, \forall b > \frac{1}{2-a} \quad (\text{C.51})$$

This means that  $h$  is convex, so there cannot be three points  $x_1 < x_2 < x_3$  such that  $0 > h(x_1) < h(x_2) > 0 > h(x_3)$ . Hence the same can be said of three zeros of  $g'$ , so  $g(x)$  cannot have more than one zero.  $\square$
